# Supplementary material for: APUM5, encoding a Pumilio RNA binding protein, negatively regulates abiotic stress responsive gene expression
Source: PubMed Central journal article supplement (PMC3986970; doi:10.1186/1471-2229-14-75), 2014-03-25

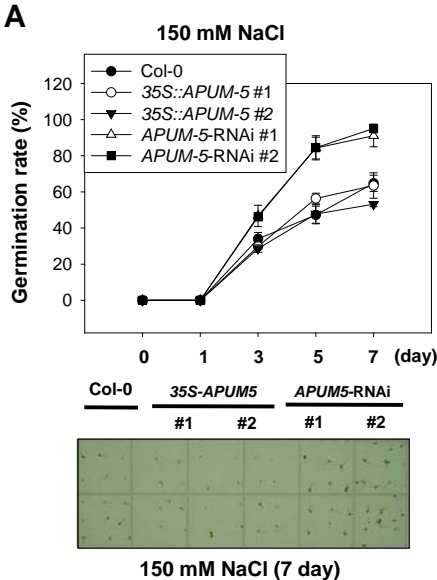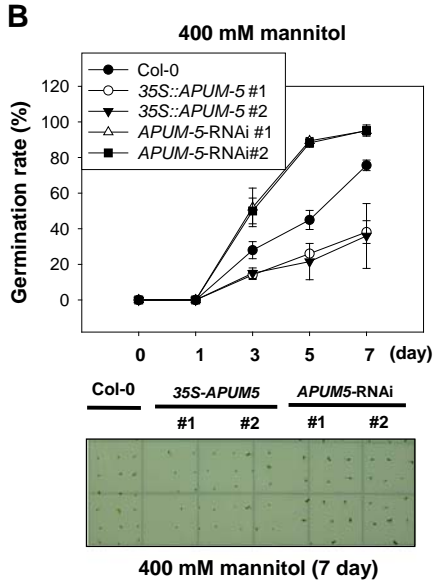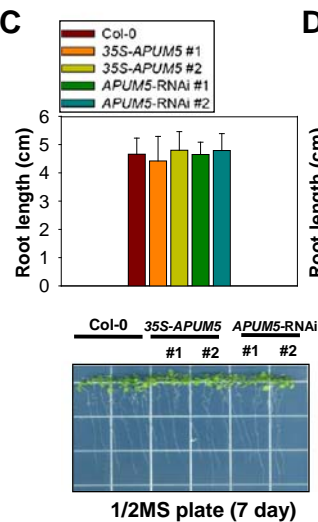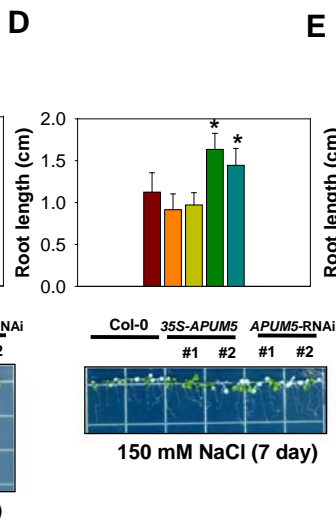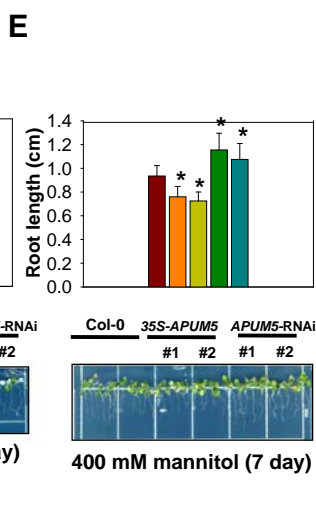

Supplement: 1471-2229-14-75-S1.pdf [file 1471-2229-14-75-S1.pdf]
