# Supplementary material for: APUM5, encoding a Pumilio RNA binding protein, negatively regulates abiotic stress responsive gene expression
Source: PubMed Central journal article supplement (PMC3986970; doi:10.1186/1471-2229-14-75), 2014-03-25
Supplement: 1471-2229-14-75-S7.pdf [file 1471-2229-14-75-S7.pdf]

# Additional file 7

## A

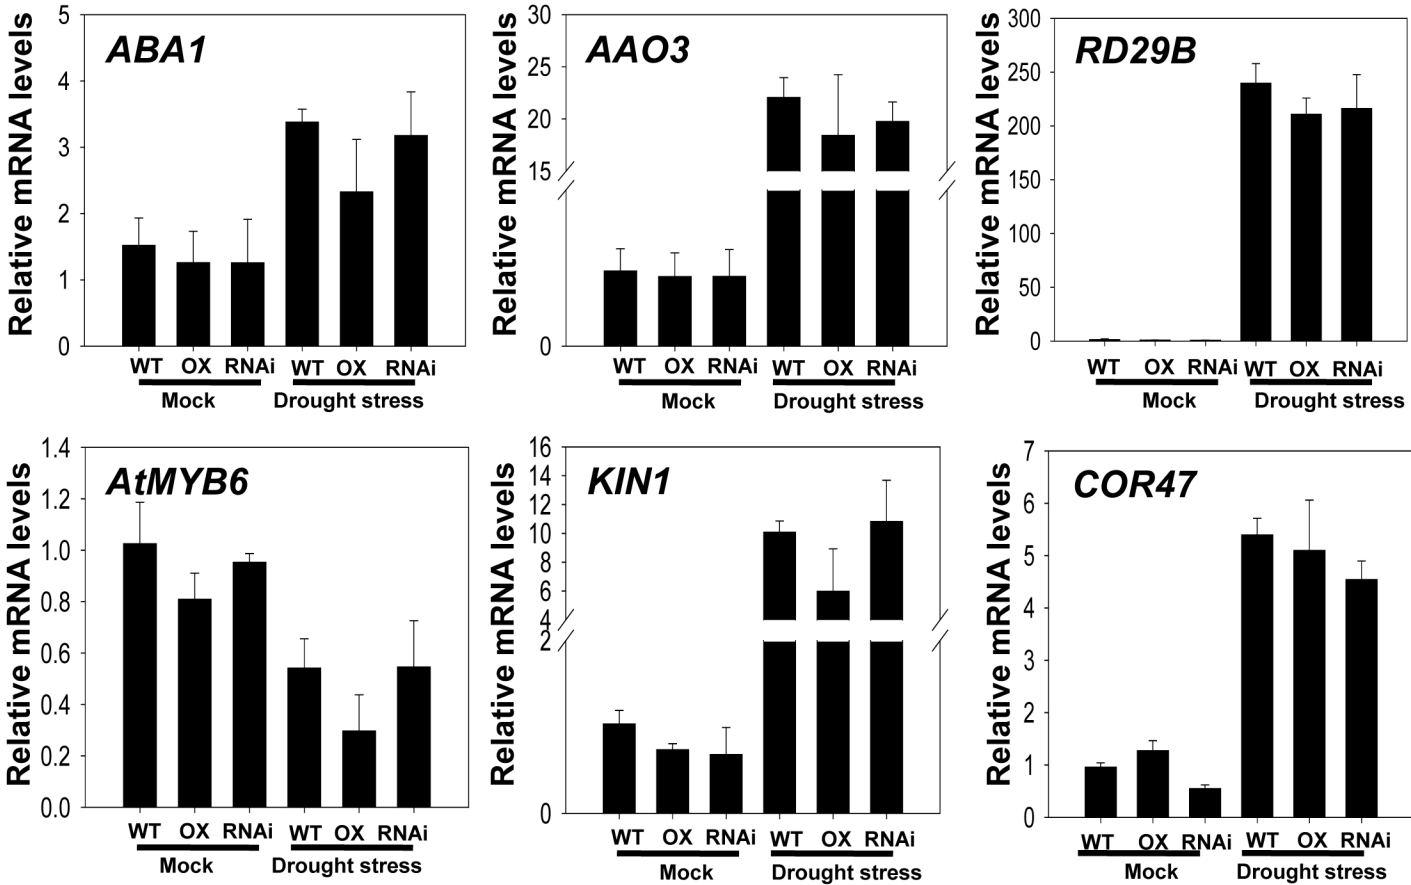

## B

>*ABA1* (AT5G67030); 5' to 3'  
 CGAAGGAAGAAGAUUAGAGCAACACCGAAUUUCCCGCGCGGUUAGAUCGUCGACAUCAUCGA  
 GUUUGGUUCAGAUAGAAGGCGCGUUUAGGGUGAAAGUAUUCAGGAAAACUCCGAAAUCGACGA  
 GGAAGAAUGAGAGUAACAACGAUAAAUAUCUUCAGACAGCUUGAAAUAAGUAAAACCGAUGGUGAA  
 AUUAAGUAAAUAUUCGGUUGGCAGAUAAAUAUAGUAGUAAAUAUUCUAAAAGAAAAAAAUUC  
 UGCUUUCAGCUAUUCCUUGCAUGACAAUGUAUAUAUGGUCUGAAAACAAAUAUAAAUAUACAA  
 GACAUUAUCUUAUUUCUUAACUCCAGGCAACAUAUAUCUAAAUAUUAUUAUUAUUAUUAUUAU  
 UUAUU

>*AtMYB6* (AT4G09460); 5' to 3'  
 UAAUUUGUCAAAAAAAUCCCAAAAAUUGGGUUUUGUUAUUAUUUUUUUUUUGCUUGAGUCCU  
 UUUGGAUAAAUAUAGAAAUCUUUACUUCAGUUCUUUUGGUUUUUUUUAGUUUUUUGUUCAU  
 AUUACCUUUUGAAGAAAAGAAAAAAACGAUACAUGGUUCCAAAUAUUUUUAUGGAAAUAUA  
 UAAGAAUAUUACCAUAUGUCUAGG

>*KIN1* (AT5G15960); 5' to 3'  
 CGAUUCGGGUCAAAUUUGGGAGUUAUAAAUUCUUUUUUAUUUAACUGUUGGGAUUUUCAAUA  
 AACGAUCUUUGAUCAGAAUUGCAUUUAUUAUUAUUAUUAUUAUUAUUAUUAUUAUUAUUAUUA  
 AAACUUAUAUUCAAAUAUUGUUUUUAUCUAAUUUUAAAAAAUAUUCUUUAUGCGAAAUAUCAC  
 CCCAAACGAUGUUAAAUGGAUCACGAUACUAUUAAGUCGAUCCGAAUUGUUGAAGUUUUU

>*AAO3* (AT2G27150); 5' to 3'  
 AGGCAAAGCAAGUAAGCAACUCUGUUGCUGUAAGUUACAGUGUUACAUUAUACUAAAAGUUUAUCA  
 GAUUUUUAUUAACAGCAAAAUAUUAUGCUUUGUGCAUAACUAAUUGGUUUCAAACCAAUAUCAA  
 AUCAAUAUUGAAUGU

>*COR47* (AT1G20440); 5' to 3'  
 GCAAAAUUGGUUAAAAGAAUGAAUUAUGAUGUGGGAGUGGGACAUUCGCUGUGUUUUGUGAUCAUUA  
 UCUUUCUUUUUUAAGUUUUAUUGUGGGCUUUCGUUGAUUGCAUUUGAUCCUUUAUUUUGUAUUU  
 CAUUCUAUCUUUAUUAUAAAGUUUGCAUUGGUUUUAUCUAAAUAUUGUUUUGAGUUUUGUAAGU  
 UGUGUGUGUAGGAGGAUUUCAUUUGGUUAUCCCAUAACACUCAUCGUUAUACUCACUCUUACGUUUG  
 CTTGATTTTACGTTTATTCACATTTGATTCACCTTTGACATTTTTCACAAAACATTTTTCACAAAACATTTT

>*RD29B* (AT5G52300); 5' to 3'  
 AGAUUUGGGGUUUUGCUUUUGAAUGUUUGUUUUUGUAUGAUGCCUCUGUUUGUGAACUUUGAU  
 GUUUUUUAUCUUUUGUGUGAAAAAGAGAUUUGGGUUAUAAAAUAUUAUUGCUUUUUUGGAUAA
