# Supplementary material for: APUM5, encoding a Pumilio RNA binding protein, negatively regulates abiotic stress responsive gene expression
Source: PubMed Central journal article supplement (PMC3986970; doi:10.1186/1471-2229-14-75), 2014-03-25
Supplement: 1471-2229-14-75-S9.pdf [file 1471-2229-14-75-S9.pdf]

# Additional file 9

## Coupled RT and qRT-PCR primers

| Gene Name     | Forward (5' to 3')       | Reverse (5' to 3')        |
|---------------|--------------------------|---------------------------|
| <i>APUM5</i>  | GGTCAAGTCGCCACTCTTTC     | CTCCAGGACATGCTGAGTGA      |
| <i>APUM6</i>  | CATTGTTCAGCCGAGTGAGA     | TGAGTCAGCCCACTGTCTTG      |
| <i>RAB18</i>  | CAGCAGCAGTATGACGAGTA     | CAGTTCCAAAGCCTTCAGTC      |
| <i>COR15</i>  | GGCCACAAAGAAAGCTTCAG     | CTTGTTTGCGGCTTCTTTTC      |
| <i>RD22</i>   | CCGGTAAAAGAACCGACGTA     | AAAGGGTTTGCTCCTGGTTT      |
| <i>ERD10</i>  | TCTCTGAACCGAGTCGTTT      | CTTCTTCTCACCGTCTTCAC      |
| <i>DREB2A</i> | AAGGTAAAGGAGGACCAGAG     | ACACAACCAGGAGTCTCAAC      |
| <i>ABI4</i>   | TCAATAACTCATCCACCGCGTTG  | AGGCCAAATGGTTCGAAGATCCATC |
| <i>ABA1</i>   | GTGATCGGATTAACGGTCTCGTTG | TGACGCCGCAGGAGTGAAAGTAT   |
| <i>AAO3</i>   | TCGGCGAGTACATTGTATAAGCCA | ACTTCCACCTCGCTGACTCCAAC   |
| <i>RD29B</i>  | CGCCACGGTCCGTTGA         | TCCACCGGAATCCGAAAAC       |
| <i>AtMYB6</i> | AAGTCTGACAGTGATGAGAGGAGC | AGTCTCATTTATAAGATTCAACAAG |
| <i>KIN1</i>   | ACCAACAAGAATGCCTTCCA     | CCGCATCCGATACTACTTTT      |
| <i>COR47</i>  | GGAGTACAAGAACAACGTTCCCGA | TGTCGTCGCTGGTGATTCTCT     |
| <i>Actin7</i> | AATGGTGAAGGCTGGTTTTG     | TGCCTCTGTGAGTAGAACTG      |
